# Supplementary material for: Butyrate Inhibits Osteoclast Activity In Vitro and Regulates Systemic Inflammation and Bone Healing in a Murine Osteotomy Model Compared to Antibiotic‐Treated Mice
Source: Hindawi journal article supplement (doi:10.1155/2021/8817421), 2021-01-01

Supplementary Figure 1

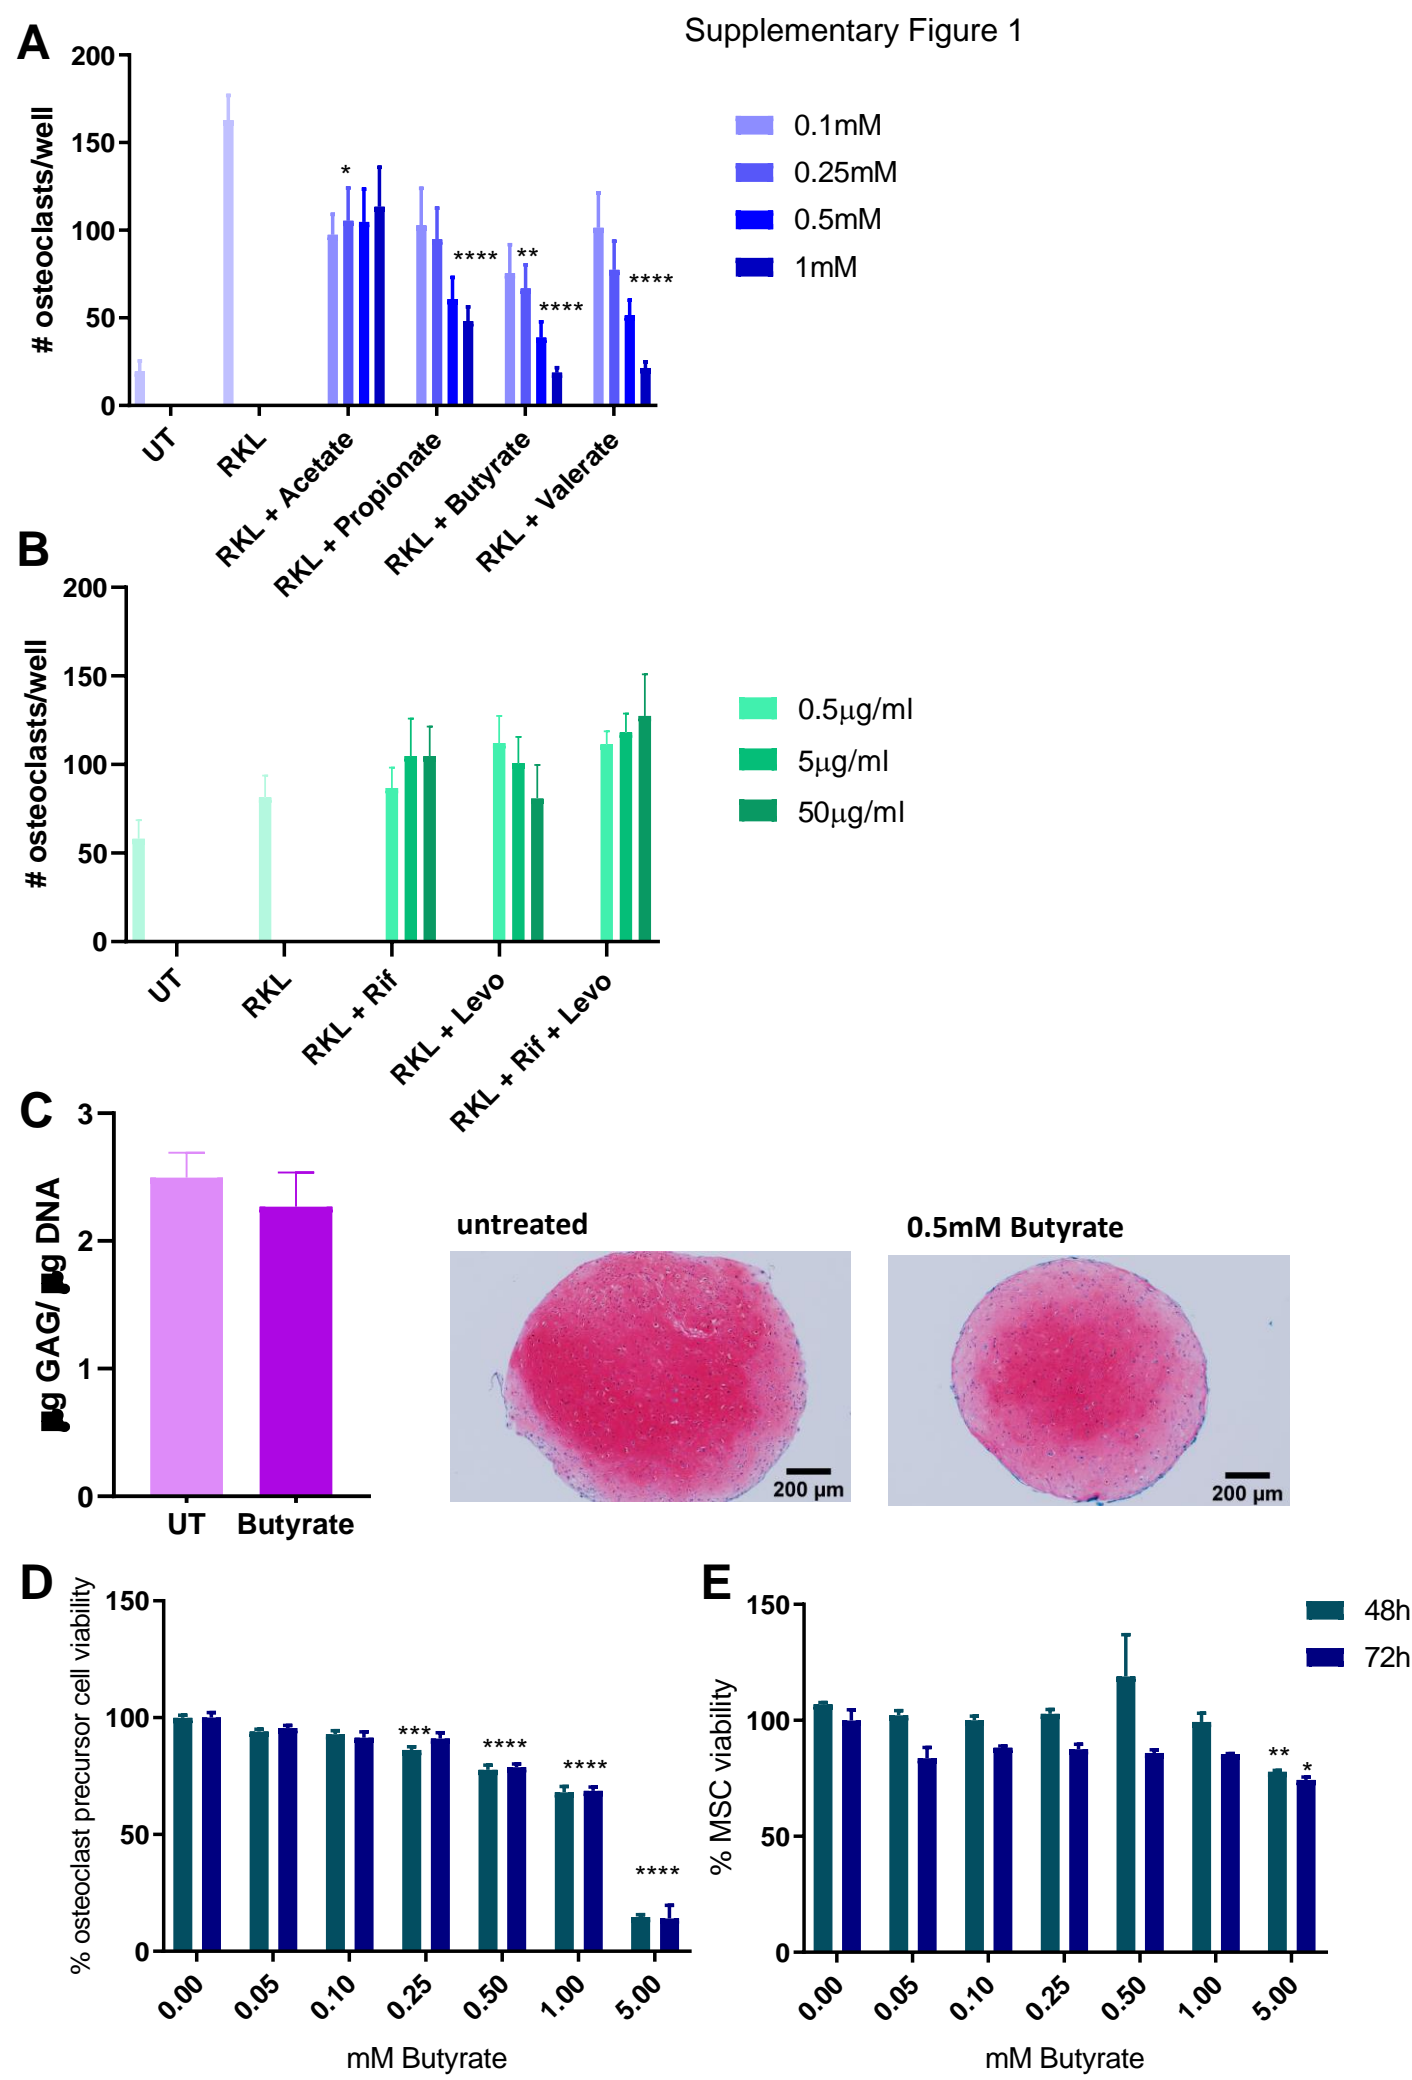

**A**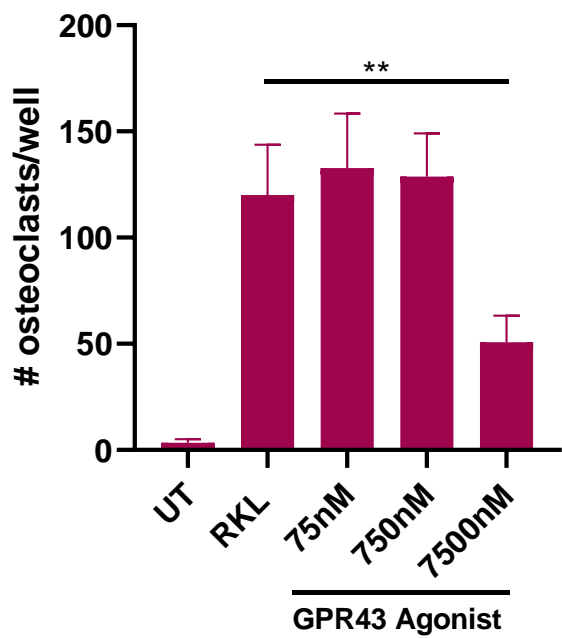**B**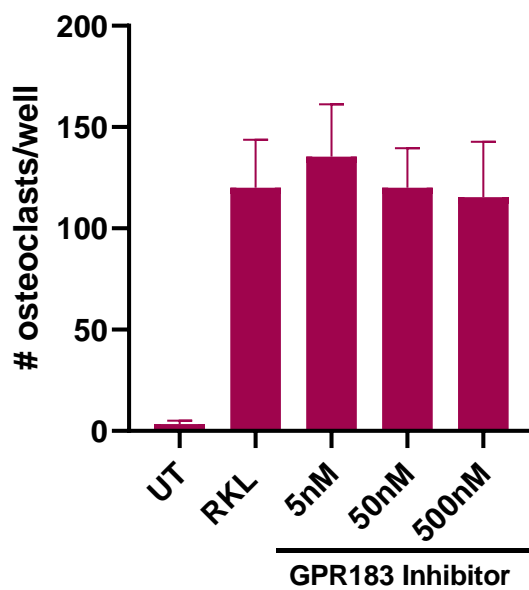**C**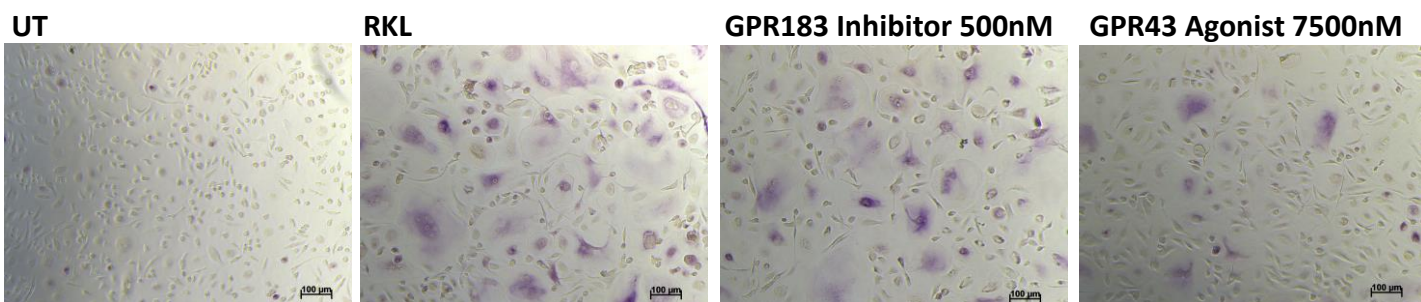

Supplementary Figure 3

**A**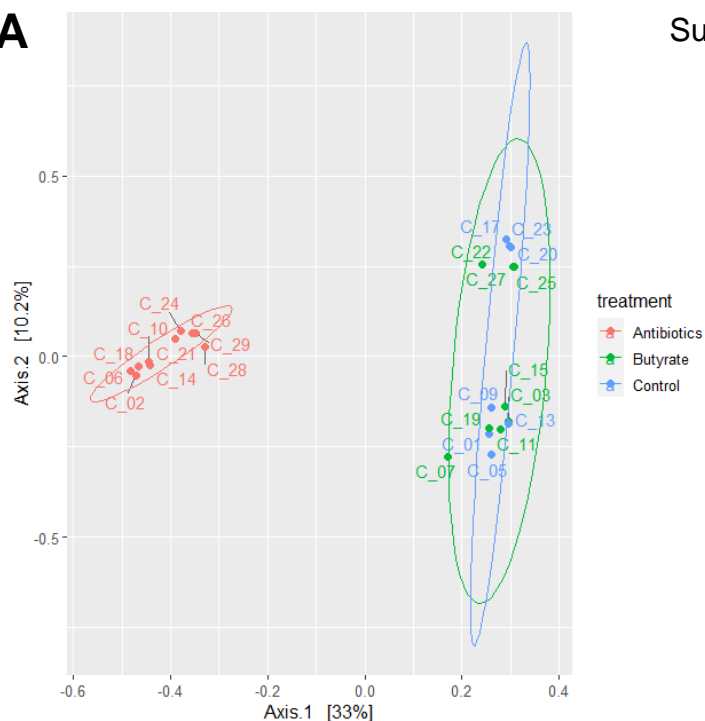**B**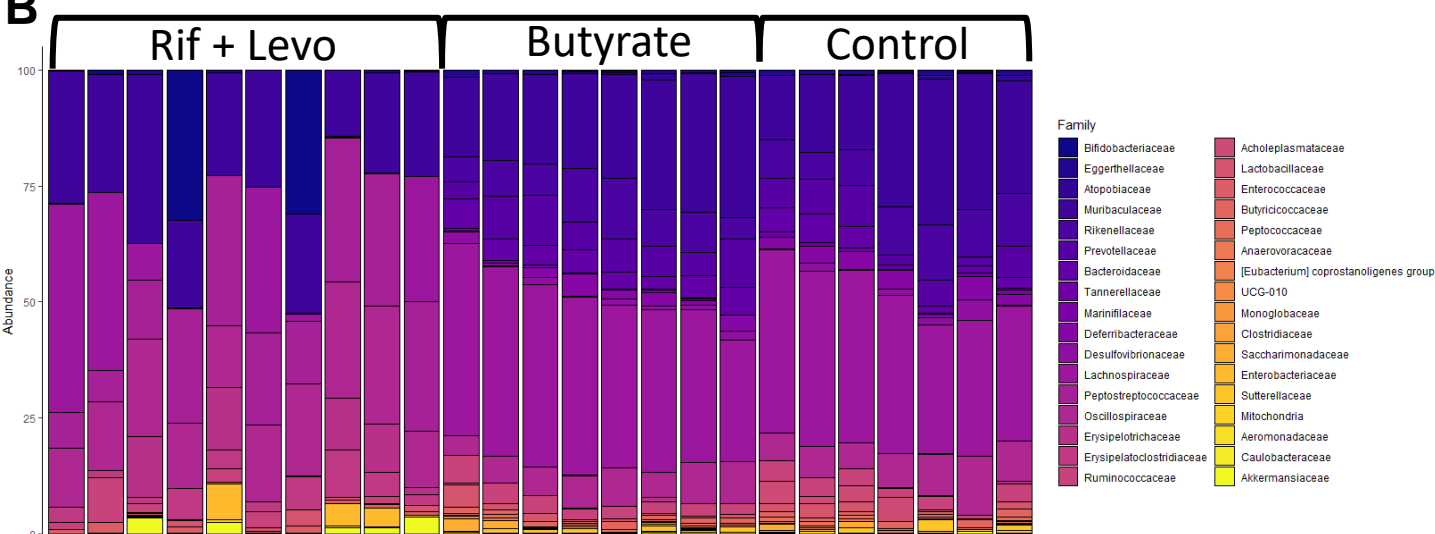**C**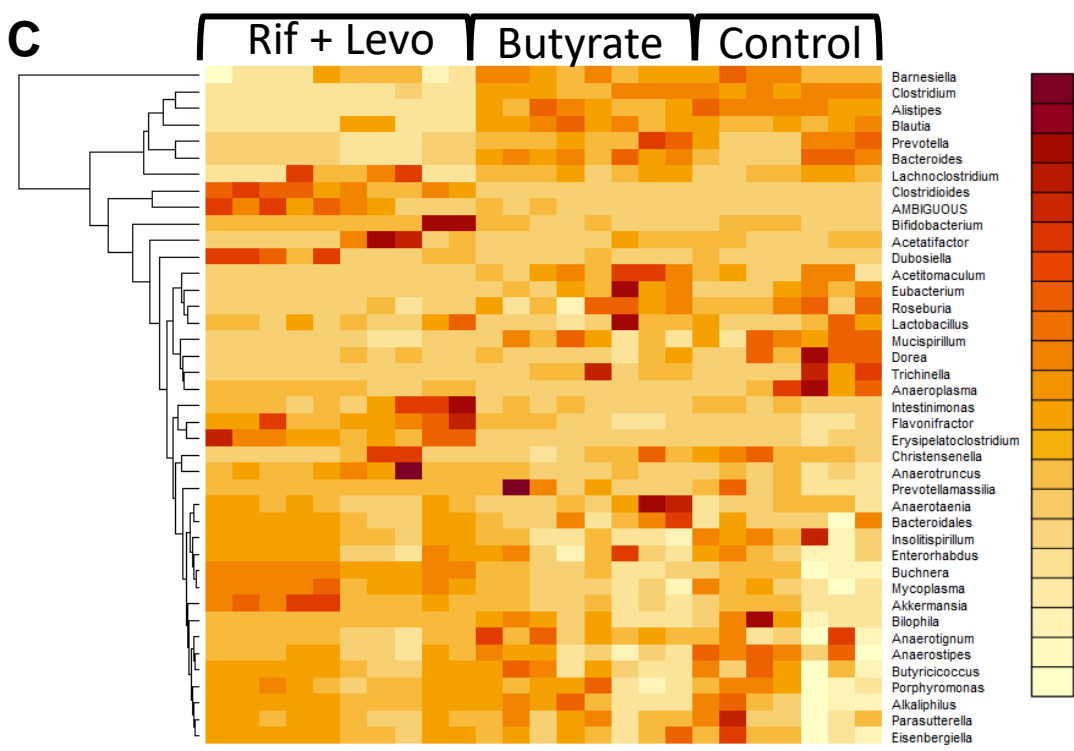

**A**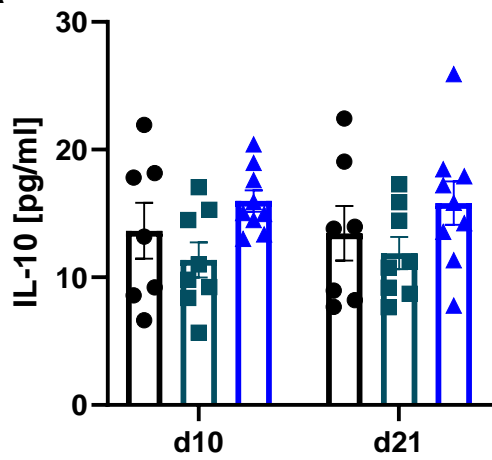**B**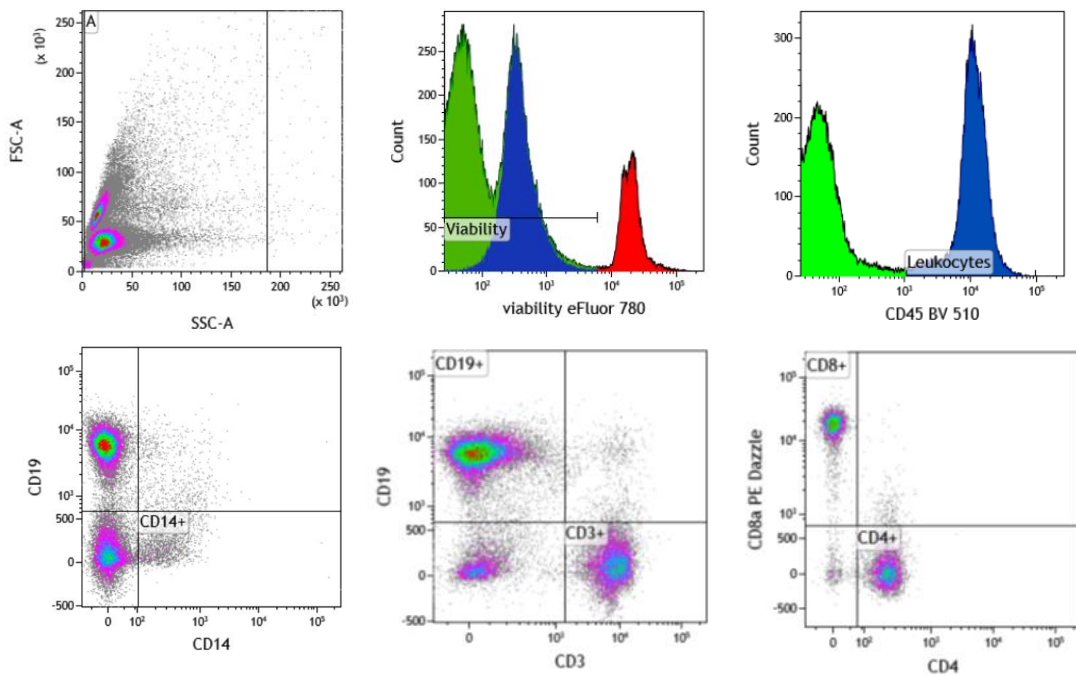

**Control**

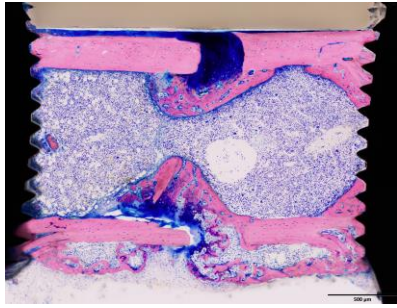

**Butyrate**

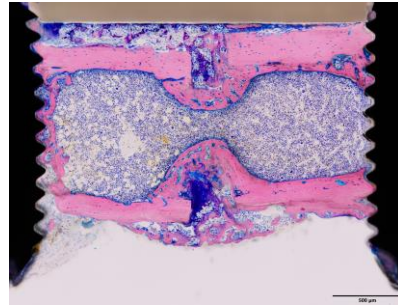

**Rif + Levo**

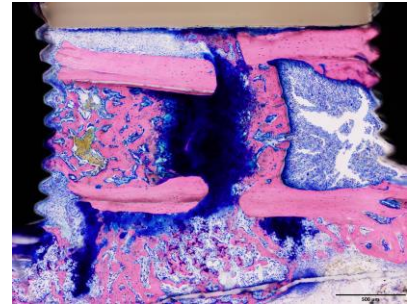

Supplement: f1 [file 8817421.f1.pdf]
